# Supplementary material
Source: publisher figshare collection journal article supplement (https://tandf.figshare.com/articles/dataset/_/7578062)

# Experiment 1

slips of the tongue

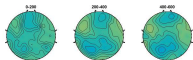

grammatical errors

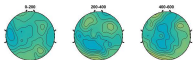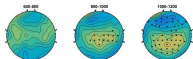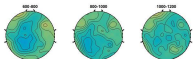

# Experiment 2

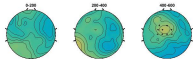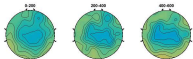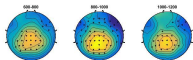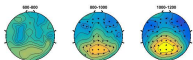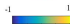

Supplement: Supplementary file 1 [file 2]
